# Supplementary material for: A ZIF-8-based platform for the rapid and highly sensitive detection of indoor formaldehyde
Source: Royal Society of Chemistry journal article supplement (doi:10.1039/c4ra05113k), 2014-01-01
Supplement: c4ra05113k1.pdf [file c4ra05113k1.pdf]

## Supplementary data

# A ZIF-8-based Platform for Rapid and Highly Sensitive Detection of Indoor Formaldehyde

Huimin Zhao\*, Xiaojing Li, Wanze Li, Peng Wang, Shuo Chen, Xie Quan

School of Environmental Science and Technology, Key Laboratory of Industrial Ecology and Environmental Engineering (Ministry of Education, China), Dalian University of Technology, Dalian, 116024, China

\*Corresponding author, Email: Zhaohuim@dlut.edu.cn Fax: +86-411-84706263

Table S1. Surface Element Contents of ZIF-8(a).

| Elt. | Line | Intensity<br>(c/s) | Contents | Units | Error<br>2-sig | MDL<br>3-sig |
|------|------|--------------------|----------|-------|----------------|--------------|
| C    | Ka   | 986.74             | 35.883   | wt.%  | .416           | .390         |
| N    | Ka   | 358.74             | 40.073   | wt.%  | .870           | 1.018        |
| O    | Ka   | 69.51              | 5.563    | wt.%  | .356           | .687         |
| Zn   | Ka   | 148.47             | 18.481   | wt.%  | .525           | .561         |
|      |      |                    | 100.000  | wt.%  |                | Total        |

Table S2. Surface Element Contents of ZIF-8(b).

| Elt. | Line | Intensity<br>(c/s) | Contents | Units | Error<br>2-sig | MDL<br>3-sig |
|------|------|--------------------|----------|-------|----------------|--------------|
| C    | Ka   | 874.17             | 34.931   | wt.%  | .434           | .433         |
| N    | Ka   | 359.02             | 41.998   | wt.%  | .919           | 1.112        |
| O    | Ka   | 41.05              | 3.854    | wt.%  | .354           | .802         |
| Zn   | Ka   | 173.05             | 19.217   | wt.%  | .490           | .482         |
|      |      |                    | 100.000  | wt.%  |                | Total        |

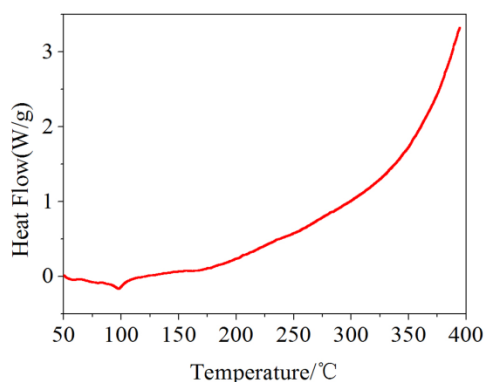

Fig. S1 DSC curve of ZIF-8(a).

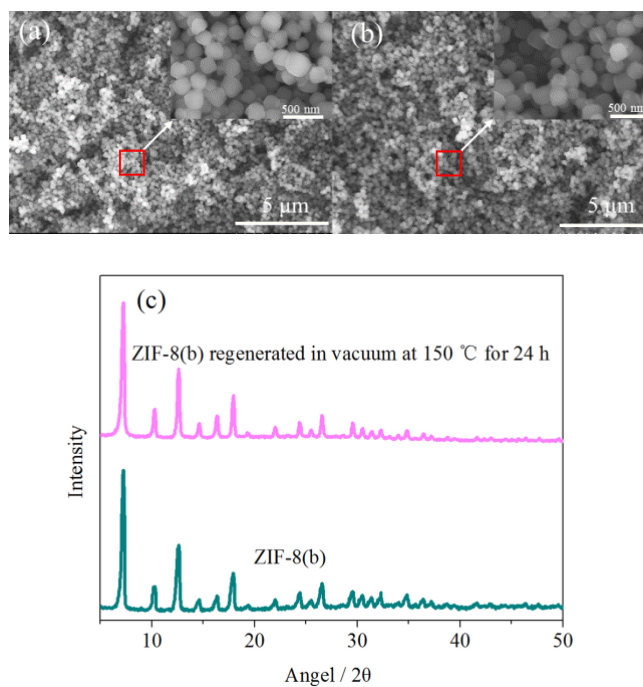

**Fig. S2** (a) SEM figure of ZIF-8(b) after regenerated in vacuum at 150 °C for 24 h. The upper-right corner figure represents an enlarged view of the red square area. (b) SEM figure of ZIF-8(b). The upper-right corner figure represents an enlarged view of the red square area. (c) XRD figures of ZIF-8(b) after regenerated in vacuum at 150 °C for 24 h and before adsorption formaldehyde.
